# Supplementary material for: A Statistical Framework to Predict Functional Non-Coding Regions in the Human Genome Through Integrated Analysis of Annotation Data
Source: PubMed Central journal article supplement (PMC4444969; doi:10.1038/srep10576), 2015-06-30

# **A Statistical Framework to Predict Functional Non-Coding Regions in the Human Genome Through Integrated Analysis of Annotation Data**

Qiongshi Lu<sup>1</sup>, Yiming Hu<sup>1</sup>, Jiehuan Sun<sup>1</sup>, Yuwei Cheng<sup>2</sup>, Kei-Hoi Cheung<sup>2,3,4,5</sup>, Hongyu Zhao<sup>1,2,5\*</sup>

<sup>1</sup>Department of Biostatistics, Yale School of Public Health, New Haven, CT, USA

<sup>2</sup>Program of Computational Biology and Bioinformatics, Yale University, New Haven, CT, USA

<sup>3</sup>Yale Center for Medical Informatics, Yale School of Medicine, New Haven, CT, USA

<sup>4</sup>Department of Emergency Medicine, Yale School of Medicine, New Haven, CT, USA

<sup>5</sup>VA Connecticut Healthcare System, West Haven, CT, USA

\*Correspondence:

Dr. Hongyu Zhao  
Department of Biostatistics  
Yale School of Public Health  
60 College Street,  
New Haven, CT, 06511, USA  
hongyu.zhao@yale.edu

## Supplementary Materials

**Supplementary Table 1.** The 22 annotations used in the model

| <b>Notation</b> | <b>Annotation</b> | <b>Category</b>      |      |
|-----------------|-------------------|----------------------|------|
| $A_1$           | GERP              | Conservation Measure |      |
| $A_2$           | PhyloP            |                      |      |
| $A_3$           | DNase I           | Open Chromatin       |      |
| $A_4$           | FAIRE             |                      |      |
| $A_5$           | H3k4me1           | Histone Modification |      |
| $A_6$           | H3k4me2           |                      |      |
| $A_7$           | H3k4me3           |                      |      |
| $A_8$           | H3k9ac            |                      |      |
| $A_9$           | H3k27ac           |                      |      |
| $A_{10}$        | H3k27me3          |                      |      |
| $A_{11}$        | H3k36me3          |                      |      |
| $A_{12}$        | H4k20me1          |                      |      |
| $A_{13}$        | CEBPB             |                      | TFBS |
| $A_{14}$        | CTCF              |                      |      |
| $A_{15}$        | EP300             |                      |      |
| $A_{16}$        | FOS               |                      |      |
| $A_{17}$        | GATA2             |                      |      |
| $A_{18}$        | JUND              |                      |      |
| $A_{19}$        | MAX               |                      |      |
| $A_{20}$        | MYC               |                      |      |
| $A_{21}$        | POLR2A            |                      |      |
| $A_{22}$        | RAD21             |                      |      |

**Supplementary Table 2.** Predicted functional proportion for each chromosome using 0.5 as the cutoff

| <b>Chromosome</b> | <b>Proportion</b> | <b>Chromosome</b> | <b>Proportion</b> |
|-------------------|-------------------|-------------------|-------------------|
| 1                 | 0.332             | 13                | 0.365             |
| 2                 | 0.331             | 14                | 0.344             |
| 3                 | 0.356             | 15                | 0.392             |
| 4                 | 0.293             | 16                | 0.338             |
| 5                 | 0.374             | 17                | 0.334             |
| 6                 | 0.316             | 18                | 0.362             |
| 7                 | 0.321             | 19                | 0.313             |
| 8                 | 0.328             | 20                | 0.340             |
| 9                 | 0.388             | 21                | 0.331             |
| 10                | 0.337             | 22                | 0.383             |
| 11                | 0.322             | X                 | 0.281             |
| 12                | 0.307             | Y                 | 0.193             |
| <b>Overall</b>    | <b>0.333</b>      |                   |                   |

**Supplementary Table 3.** Online sources for the 22 annotations

| <b>Annotation</b> | <b>Website</b>                                                                                                                                                                                                                                                    |
|-------------------|-------------------------------------------------------------------------------------------------------------------------------------------------------------------------------------------------------------------------------------------------------------------|
| GERP              | <a href="http://mendel.stanford.edu/SidowLab/downloads/gerp/">http://mendel.stanford.edu/SidowLab/downloads/gerp/</a>                                                                                                                                             |
| PhyloP            | <a href="http://hgdownload.soe.ucsc.edu/goldenPath/hg19/phyloP46way/">http://hgdownload.soe.ucsc.edu/goldenPath/hg19/phyloP46way/</a>                                                                                                                             |
| DNase I           | <a href="http://hgdownload.cse.ucsc.edu/goldenPath/hg19/encodeDCC/wgEncodeRegDnaseClustered/">http://hgdownload.cse.ucsc.edu/goldenPath/hg19/encodeDCC/wgEncodeRegDnaseClustered/</a>                                                                             |
| FAIRE             | <a href="http://ftp.ebi.ac.uk/pub/databases/ensembl/encode/integration_data_jan2011/byDataType/openchrom/jan2011/faire_fseq_peaks/">http://ftp.ebi.ac.uk/pub/databases/ensembl/encode/integration_data_jan2011/byDataType/openchrom/jan2011/faire_fseq_peaks/</a> |
| H3k4me1           | <a href="http://genome.ucsc.edu/cgi-bin/hgFileUi?db=hg19&amp;g=wgEncodeBroadHistone/">http://genome.ucsc.edu/cgi-bin/hgFileUi?db=hg19&amp;g=wgEncodeBroadHistone/</a>                                                                                             |
| H3k4me2           |                                                                                                                                                                                                                                                                   |
| H3k4me3           |                                                                                                                                                                                                                                                                   |
| H3k9ac            |                                                                                                                                                                                                                                                                   |
| H3k27ac           |                                                                                                                                                                                                                                                                   |
| H3k27me3          |                                                                                                                                                                                                                                                                   |
| H3k36me3          |                                                                                                                                                                                                                                                                   |
| H4k20me1          |                                                                                                                                                                                                                                                                   |
| CEBPB             | <a href="http://hgdownload.cse.ucsc.edu/goldenPath/hg19/encodeDCC/wgEncodeRegTfbsClustered/">http://hgdownload.cse.ucsc.edu/goldenPath/hg19/encodeDCC/wgEncodeRegTfbsClustered/</a>                                                                               |
| CTCF              |                                                                                                                                                                                                                                                                   |
| EP300             |                                                                                                                                                                                                                                                                   |
| FOS               |                                                                                                                                                                                                                                                                   |
| GATA2             |                                                                                                                                                                                                                                                                   |
| JUND              |                                                                                                                                                                                                                                                                   |
| MAX               |                                                                                                                                                                                                                                                                   |
| MYC               |                                                                                                                                                                                                                                                                   |
| POLR2A            |                                                                                                                                                                                                                                                                   |
| RAD21             |                                                                                                                                                                                                                                                                   |

**Supplementary Table 4.** 16 Cell lines used to cluster the histone peak signal

| <b>Cell Line</b> |
|------------------|
| A549             |
| Dnd41            |
| Gm12878          |
| H1hesc           |
| Helas3           |
| Hepg2            |
| Hmec             |
| Hsmm             |
| Hsmt             |
| Huvec            |
| K562             |
| Monocd14ro1746   |
| Nha              |
| Nhdfad           |
| Nhek             |
| Nhlf             |

**Supplementary Table 5.** Estimates of all 49 parameters and the odds ratios for binary annotations

| Parameter     | Estimate (Z=1) | Parameter     | Estimate (Z=0) | Odds Ratio |
|---------------|----------------|---------------|----------------|------------|
| $\pi$         | 0.4274         | $1 - \pi$     | 0.5726         | -          |
| $\mu_{11}$    | -0.1414        | $\mu_{10}$    | -0.0608        | -          |
| $\mu_{21}$    | 0.1249         | $\mu_{20}$    | 0.0742         | -          |
| $\sigma_{11}$ | 2.5274         | $\sigma_{10}$ | 1.6262         | -          |
| $\sigma_{21}$ | 1.0765         | $\sigma_{20}$ | 0.6623         | -          |
| $p_{31}$      | 0.3145         | $p_{30}$      | 0.0610         | 7.06       |
| $p_{41}$      | 0.3061         | $p_{40}$      | 0.0941         | 4.25       |
| $p_{51}$      | 0.9535         | $p_{50}$      | 0.3016         | 47.48      |
| $p_{61}$      | 0.7633         | $p_{60}$      | 0.0943         | 30.97      |
| $p_{71}$      | 0.6562         | $p_{70}$      | 0.0634         | 28.20      |
| $p_{81}$      | 0.7994         | $p_{80}$      | 0.1418         | 24.12      |
| $p_{91}$      | 0.8712         | $p_{90}$      | 0.2085         | 25.68      |
| $p_{10,1}$    | 0.7983         | $p_{10,0}$    | 0.7248         | 1.50       |
| $p_{11,1}$    | 0.8287         | $p_{11,0}$    | 0.3764         | 8.01       |
| $p_{12,1}$    | 0.9246         | $p_{12,0}$    | 0.6360         | 7.02       |
| $p_{13,1}$    | 0.0360         | $p_{13,0}$    | 0.0041         | 9.07       |
| $p_{14,1}$    | 0.0509         | $p_{14,0}$    | 0.0060         | 8.88       |
| $p_{15,1}$    | 0.0480         | $p_{15,0}$    | 0.0017         | 29.61      |
| $p_{16,1}$    | 0.0359         | $p_{16,0}$    | 0.0018         | 20.65      |
| $p_{17,1}$    | 0.0276         | $p_{17,0}$    | 0.0026         | 10.89      |
| $p_{18,1}$    | 0.0312         | $p_{18,0}$    | 0.0015         | 21.44      |
| $p_{19,1}$    | 0.0371         | $p_{19,0}$    | 0.0003         | 128.39     |
| $p_{20,1}$    | 0.0383         | $p_{20,0}$    | 0.0007         | 56.85      |
| $p_{21,1}$    | 0.1002         | $p_{21,0}$    | 0.0023         | 48.31      |
| $p_{22,1}$    | 0.0278         | $p_{22,0}$    | 0.0020         | 14.27      |

**Supplementary Table 6.** Estimates of all 49 parameters with the missing conservation values replaced by 0

| <b>Parameter</b> | <b>Estimate (Z=1)</b> | <b>Parameter</b> | <b>Estimate (Z=0)</b> |
|------------------|-----------------------|------------------|-----------------------|
| $\pi$            | 0.4305                | $1 - \pi$        | 0.5695                |
| $\mu_{11}$       | -0.1676               | $\mu_{10}$       | -0.0377               |
| $\mu_{21}$       | 0.1142                | $\mu_{20}$       | 0.0791                |
| $\sigma_{11}$    | 2.5549                | $\sigma_{10}$    | 1.5445                |
| $\sigma_{21}$    | 1.0886                | $\sigma_{20}$    | 0.6269                |
| $p_{31}$         | 0.3051                | $p_{30}$         | 0.0621                |
| $p_{41}$         | 0.2976                | $p_{40}$         | 0.0949                |
| $p_{51}$         | 0.9493                | $p_{50}$         | 0.3646                |
| $p_{61}$         | 0.7789                | $p_{60}$         | 0.1233                |
| $p_{71}$         | 0.6659                | $p_{70}$         | 0.0765                |
| $p_{81}$         | 0.8024                | $p_{80}$         | 0.1688                |
| $p_{91}$         | 0.8552                | $p_{90}$         | 0.2286                |
| $p_{10,1}$       | 0.8442                | $p_{10,0}$       | 0.7696                |
| $p_{11,1}$       | 0.8493                | $p_{11,0}$       | 0.4570                |
| $p_{12,1}$       | 0.9397                | $p_{12,0}$       | 0.7115                |
| $p_{13,1}$       | 0.0355                | $p_{13,0}$       | 0.0038                |
| $p_{14,1}$       | 0.0500                | $p_{14,0}$       | 0.0057                |
| $p_{15,1}$       | 0.0468                | $p_{15,0}$       | 0.0018                |
| $p_{16,1}$       | 0.0348                | $p_{16,0}$       | 0.0019                |
| $p_{17,1}$       | 0.0272                | $p_{17,0}$       | 0.0024                |
| $p_{18,1}$       | 0.0305                | $p_{18,0}$       | 0.0015                |
| $p_{19,1}$       | 0.0362                | $p_{19,0}$       | 0.0004                |
| $p_{20,1}$       | 0.0377                | $p_{20,0}$       | 0.0005                |
| $p_{21,1}$       | 0.0974                | $p_{21,0}$       | 0.0028                |
| $p_{22,1}$       | 0.0273                | $p_{22,0}$       | 0.0019                |

**Supplementary Table 7.** Estimates of all 49 parameters when an extra sample of randomly chosen 2,000,000 positions on chromosome 1 was added into the original dataset

| <b>Parameter</b> | <b>Estimate (Z=1)</b> | <b>Parameter</b> | <b>Estimate (Z=0)</b> |
|------------------|-----------------------|------------------|-----------------------|
| $\pi$            | 0.4332                | $1 - \pi$        | 0.5668                |
| $\mu_{11}$       | -0.1648               | $\mu_{10}$       | -0.0334               |
| $\mu_{21}$       | 0.1162                | $\mu_{20}$       | 0.0805                |
| $\sigma_{11}$    | 2.5571                | $\sigma_{10}$    | 1.5362                |
| $\sigma_{21}$    | 1.0876                | $\sigma_{20}$    | 0.6247                |
| $p_{31}$         | 0.3058                | $p_{30}$         | 0.0593                |
| $p_{41}$         | 0.2937                | $p_{40}$         | 0.0935                |
| $p_{51}$         | 0.9455                | $p_{50}$         | 0.3382                |
| $p_{61}$         | 0.7673                | $p_{60}$         | 0.1094                |
| $p_{71}$         | 0.6456                | $p_{70}$         | 0.0642                |
| $p_{81}$         | 0.7880                | $p_{80}$         | 0.1476                |
| $p_{91}$         | 0.8516                | $p_{90}$         | 0.2276                |
| $p_{10,1}$       | 0.8388                | $p_{10,0}$       | 0.7393                |
| $p_{11,1}$       | 0.8371                | $p_{11,0}$       | 0.4247                |
| $p_{12,1}$       | 0.9392                | $p_{12,0}$       | 0.6928                |
| $p_{13,1}$       | 0.0353                | $p_{13,0}$       | 0.0037                |
| $p_{14,1}$       | 0.0497                | $p_{14,0}$       | 0.0057                |
| $p_{15,1}$       | 0.0464                | $p_{15,0}$       | 0.0017                |
| $p_{16,1}$       | 0.0351                | $p_{16,0}$       | 0.0019                |
| $p_{17,1}$       | 0.0276                | $p_{17,0}$       | 0.0024                |
| $p_{18,1}$       | 0.0307                | $p_{18,0}$       | 0.0014                |
| $p_{19,1}$       | 0.0359                | $p_{19,0}$       | 0.0004                |
| $p_{20,1}$       | 0.0379                | $p_{20,0}$       | 0.0005                |
| $p_{21,1}$       | 0.0957                | $p_{21,0}$       | 0.0025                |
| $p_{22,1}$       | 0.0270                | $p_{22,0}$       | 0.0018                |



**Supplementary Table 8.** Estimates of all 49 parameters when an extra sample of randomly chosen 6,000,000 positions on chromosome 1 was added into the original dataset

| Parameter     | Estimate (Z=1) | Parameter     | Estimate (Z=0) |
|---------------|----------------|---------------|----------------|
| $\pi$         | 0.4393         | $1 - \pi$     | 0.5607         |
| $\mu_{11}$    | -0.1747        | $\mu_{10}$    | -0.0126        |
| $\mu_{21}$    | 0.1135         | $\mu_{20}$    | 0.0824         |
| $\sigma_{11}$ | 2.5745         | $\sigma_{10}$ | 1.4384         |
| $\sigma_{21}$ | 1.0908         | $\sigma_{20}$ | 0.5882         |
| $p_{31}$      | 0.3015         | $p_{30}$      | 0.0523         |
| $p_{41}$      | 0.2838         | $p_{40}$      | 0.0886         |
| $p_{51}$      | 0.9317         | $p_{50}$      | 0.2969         |
| $p_{61}$      | 0.7388         | $p_{60}$      | 0.0884         |
| $p_{71}$      | 0.6056         | $p_{70}$      | 0.0477         |
| $p_{81}$      | 0.7566         | $p_{80}$      | 0.1150         |
| $p_{91}$      | 0.8387         | $p_{90}$      | 0.2214         |
| $p_{10,1}$    | 0.8298         | $p_{10,0}$    | 0.6918         |
| $p_{11,1}$    | 0.8120         | $p_{11,0}$    | 0.3750         |
| $p_{12,1}$    | 0.9362         | $p_{12,0}$    | 0.6575         |
| $p_{13,1}$    | 0.0342         | $p_{13,0}$    | 0.0034         |
| $p_{14,1}$    | 0.0482         | $p_{14,0}$    | 0.0051         |
| $p_{15,1}$    | 0.0448         | $p_{15,0}$    | 0.0015         |
| $p_{16,1}$    | 0.0347         | $p_{16,0}$    | 0.0018         |
| $p_{17,1}$    | 0.0277         | $p_{17,0}$    | 0.0021         |
| $p_{18,1}$    | 0.0303         | $p_{18,0}$    | 0.0012         |
| $p_{19,1}$    | 0.0346         | $p_{19,0}$    | 0.0003         |
| $p_{20,1}$    | 0.0373         | $p_{20,0}$    | 0.0004         |
| $p_{21,1}$    | 0.0911         | $p_{21,0}$    | 0.0019         |
| $p_{22,1}$    | 0.0259         | $p_{22,0}$    | 0.0016         |

**Supplementary Table 9.** Estimates of parameters when GERP, DNase I, H3k4me2 and H4k20me1, and CEBPB and MAX are dropped from the model, respectively

| Param.        | Estimate<br>(Z=1)<br>Without<br>GERP | Estimate<br>(Z=1)<br>Without<br>DNaseI | Estimate<br>(Z=1)<br>Without<br>H3k4me2<br>H4k20me1 | Estimate<br>(Z=1)<br>Without<br>CEBPB<br>MAX | Param.        | Estimate<br>(Z=0)<br>Without<br>GERP | Estimate<br>(Z=0)<br>Without<br>DNaseI | Estimate<br>(Z=0)<br>Without<br>H3k4me2<br>H4k20me1 | Estimate<br>(Z=0)<br>Without<br>CEBPB<br>MAX |
|---------------|--------------------------------------|----------------------------------------|-----------------------------------------------------|----------------------------------------------|---------------|--------------------------------------|----------------------------------------|-----------------------------------------------------|----------------------------------------------|
| $\pi$         | 0.4201                               | 0.4361                                 | 0.4417                                              | 0.4375                                       | $1 - \pi$     | 0.5799                               | 0.5639                                 | 0.5583                                              | 0.5625                                       |
| $\mu_{11}$    | -                                    | -0.1671                                | -0.2468                                             | -0.1696                                      | $\mu_{10}$    | -                                    | -0.0368                                | 0.0277                                              | -0.0344                                      |
| $\mu_{21}$    | 0.1362                               | 0.1131                                 | 0.0902                                              | 0.1126                                       | $\mu_{20}$    | 0.0637                               | 0.0796                                 | 0.0974                                              | 0.0799                                       |
| $\sigma_{11}$ | -                                    | 2.5469                                 | 2.6781                                              | 2.5510                                       | $\sigma_{10}$ | -                                    | 1.5412                                 | 1.3288                                              | 1.5324                                       |
| $\sigma_{21}$ | 1.0328                               | 1.0855                                 | 1.1355                                              | 1.0861                                       | $\sigma_{20}$ | 0.7009                               | 0.6249                                 | 0.5433                                              | 0.6225                                       |
| $p_{31}$      | 0.3069                               | -                                      | 0.3039                                              | 0.3015                                       | $p_{30}$      | 0.0651                               | -                                      | 0.0582                                              | 0.0618                                       |
| $p_{41}$      | 0.3001                               | 0.2933                                 | 0.2961                                              | 0.2948                                       | $p_{40}$      | 0.0967                               | 0.0962                                 | 0.0921                                              | 0.0946                                       |
| $p_{51}$      | 0.9653                               | 0.9484                                 | 0.9175                                              | 0.9467                                       | $p_{50}$      | 0.3633                               | 0.3594                                 | 0.3779                                              | 0.3593                                       |
| $p_{61}$      | 0.7970                               | 0.7736                                 | -                                                   | 0.7724                                       | $p_{60}$      | 0.1219                               | 0.1208                                 | -                                                   | 0.1202                                       |
| $p_{71}$      | 0.6817                               | 0.6623                                 | 0.6425                                              | 0.6594                                       | $p_{70}$      | 0.0755                               | 0.0733                                 | 0.0831                                              | 0.0742                                       |
| $p_{81}$      | 0.8181                               | 0.7998                                 | 0.7802                                              | 0.7978                                       | $p_{80}$      | 0.1687                               | 0.1645                                 | 0.1736                                              | 0.1645                                       |
| $p_{91}$      | 0.8725                               | 0.8562                                 | 0.8357                                              | 0.8517                                       | $p_{90}$      | 0.2272                               | 0.2215                                 | 0.2314                                              | 0.2235                                       |
| $p_{10,1}$    | 0.8438                               | 0.8431                                 | 0.8423                                              | 0.8441                                       | $p_{10,0}$    | 0.7712                               | 0.7697                                 | 0.7696                                              | 0.7688                                       |
| $p_{11,1}$    | 0.8574                               | 0.8513                                 | 0.8390                                              | 0.8476                                       | $p_{11,0}$    | 0.4581                               | 0.4515                                 | 0.4573                                              | 0.4534                                       |
| $p_{12,1}$    | 0.9417                               | 0.9398                                 | -                                                   | 0.9394                                       | $p_{12,0}$    | 0.7141                               | 0.7091                                 | -                                                   | 0.7089                                       |
| $p_{13,1}$    | 0.0361                               | 0.0347                                 | 0.0352                                              | -                                            | $p_{13,0}$    | 0.0039                               | 0.0041                                 | 0.0034                                              | -                                            |
| $p_{14,1}$    | 0.0505                               | 0.0483                                 | 0.0501                                              | 0.0492                                       | $p_{14,0}$    | 0.0061                               | 0.0066                                 | 0.0047                                              | 0.0058                                       |
| $p_{15,1}$    | 0.0477                               | 0.0458                                 | 0.0460                                              | 0.0460                                       | $p_{15,0}$    | 0.0020                               | 0.0021                                 | 0.0015                                              | 0.0018                                       |
| $p_{16,1}$    | 0.0355                               | 0.0338                                 | 0.0346                                              | 0.0342                                       | $p_{16,0}$    | 0.0020                               | 0.0024                                 | 0.0014                                              | 0.0020                                       |
| $p_{17,1}$    | 0.0274                               | 0.0266                                 | 0.0272                                              | 0.0268                                       | $p_{17,0}$    | 0.0027                               | 0.0026                                 | 0.0019                                              | 0.0023                                       |
| $p_{18,1}$    | 0.0311                               | 0.0300                                 | 0.0302                                              | 0.0300                                       | $p_{18,0}$    | 0.0015                               | 0.0016                                 | 0.0011                                              | 0.0015                                       |
| $p_{19,1}$    | 0.0370                               | 0.0357                                 | 0.0355                                              | -                                            | $p_{19,0}$    | 0.0004                               | 0.0005                                 | 0.0003                                              | -                                            |
| $p_{20,1}$    | 0.0385                               | 0.0370                                 | 0.0369                                              | 0.0370                                       | $p_{20,0}$    | 0.0006                               | 0.0006                                 | 0.0004                                              | 0.0006                                       |
| $p_{21,1}$    | 0.0994                               | 0.0958                                 | 0.0958                                              | 0.0960                                       | $p_{21,0}$    | 0.0030                               | 0.0031                                 | 0.0022                                              | 0.0028                                       |
| $p_{22,1}$    | 0.0276                               | 0.0263                                 | 0.0275                                              | 0.0269                                       | $p_{22,0}$    | 0.0021                               | 0.0024                                 | 0.0012                                              | 0.0019                                       |

**Supplementary Figure 1.** Histograms of prediction score in 24 chromosomes.

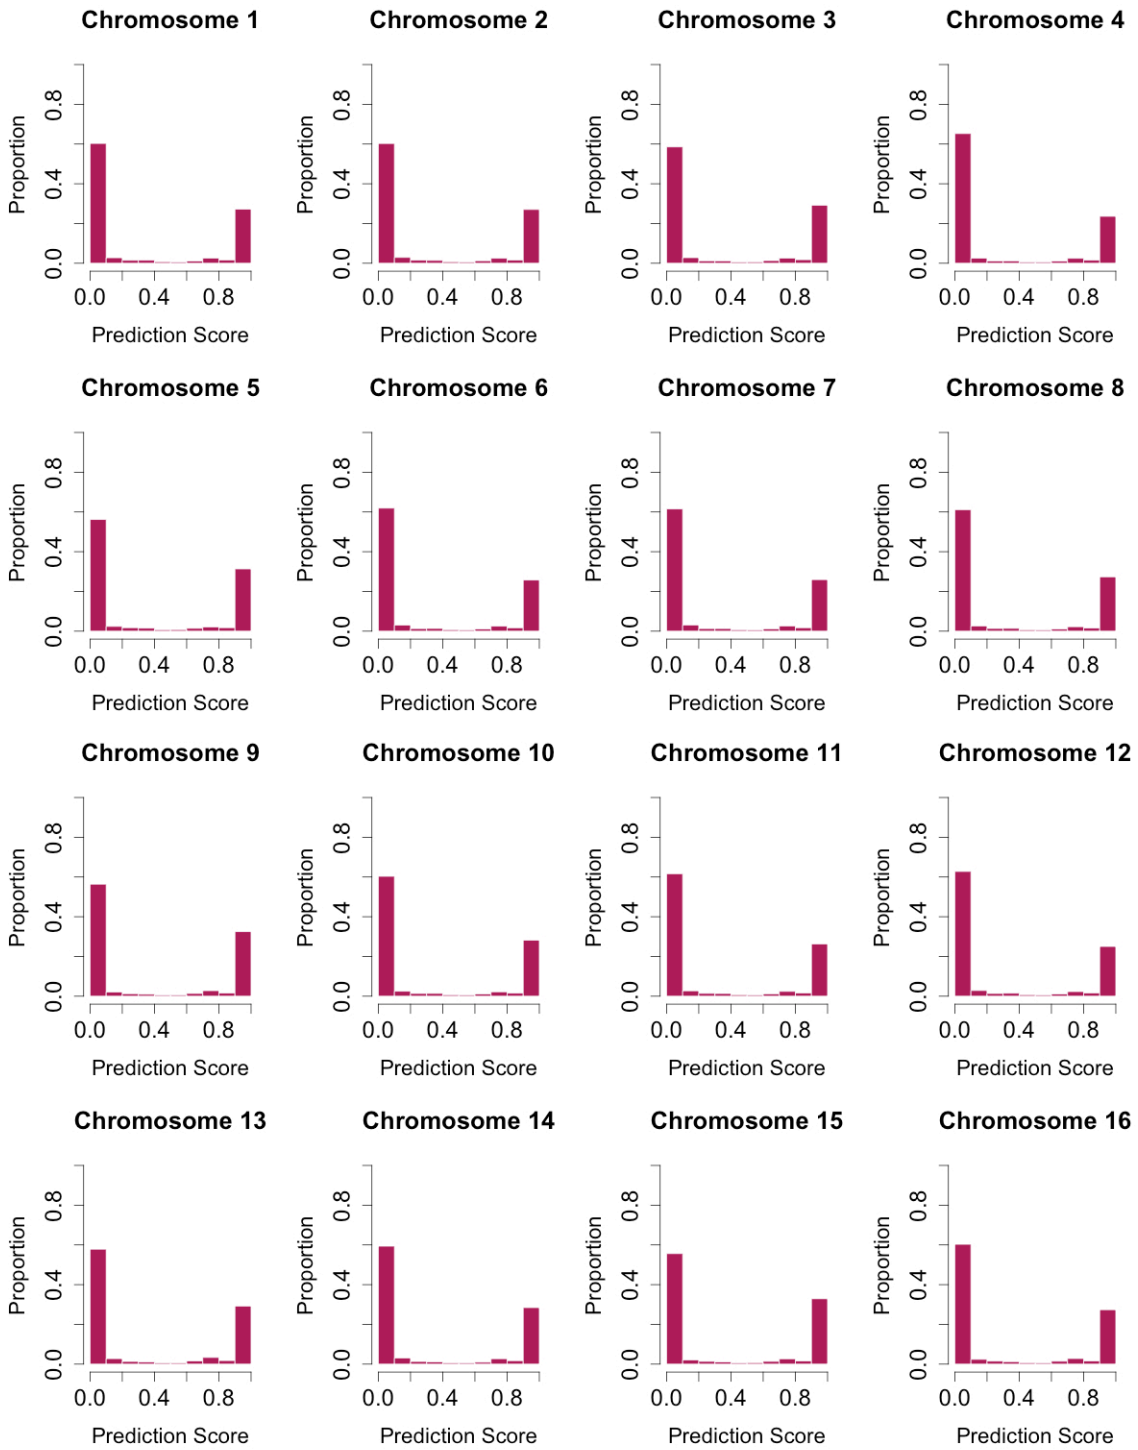

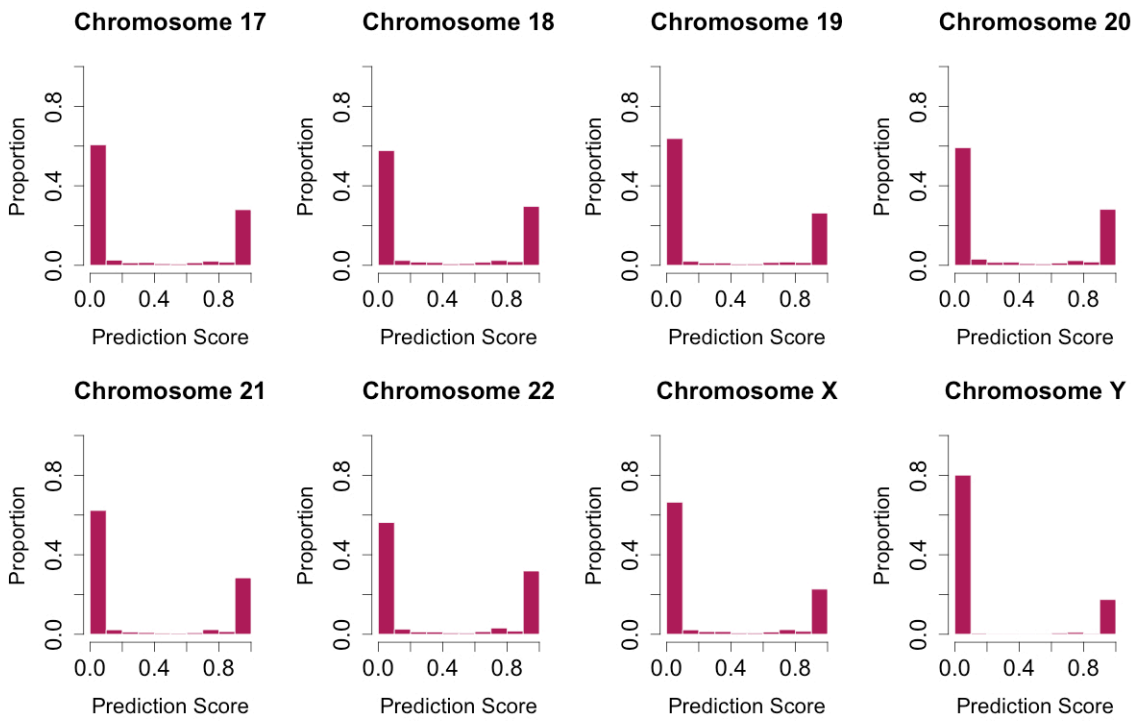

Supplement: srep10576-s1.pdf [file srep10576-s1.pdf]
